# Supplementary material for: Molecular identification of Bulinus spp. intermediate host snails of Schistosoma spp. in crater lakes of western Uganda with implications for the transmission of the Schistosoma haematobium group parasites
Source: PubMed Central journal article supplement (PMC6882369; doi:10.1186/s13071-019-3811-2), 2019-11-27

- Crater lake population
- Regional population
- Others
- A** *B. africanus* group
- B** *B. forskalii* group
- C** *B. truncatus/tropicus* complex
- D** *B. reticulatus* group

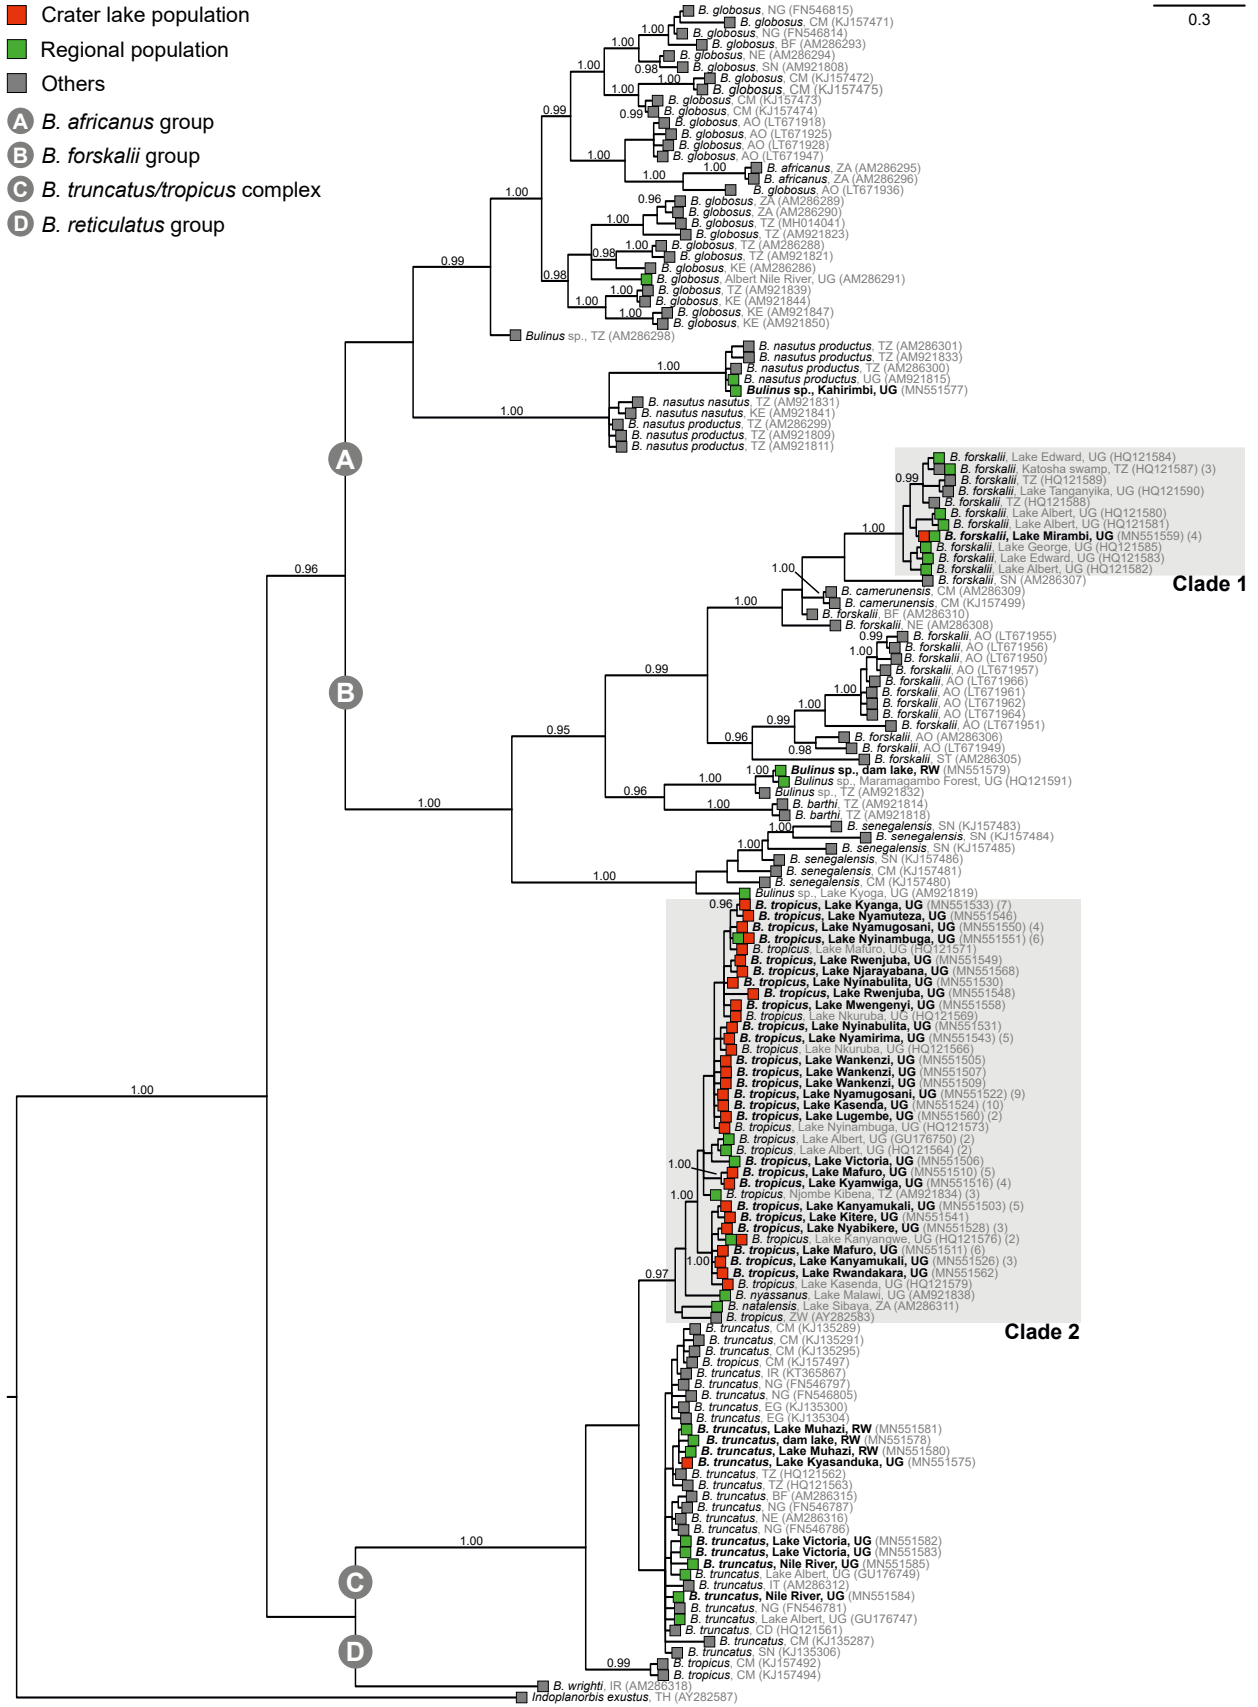

Supplement: 13071_2019_3811_MOESM2_ESM.pdf [file 13071_2019_3811_MOESM2_ESM.pdf]
